# Supplementary material for: Targeting SARS-CoV-2 Macrodomain-1 to Restore the Innate Immune Response Using In Silico Screening of Medicinal Compounds and Free Energy Calculation Approaches
Source: MDPI journal article supplement (doi:10.3390/v15091907), 2023-09-12
Supplement: s1 [file s1]

**Table S1:** Time-dependent distribution of protonation and deprotonation states of Aspartate and Glutamate residues.

| <b>Time Interval<br/>(ns)</b> | <b>Asp Protonated<br/>(%)</b> | <b>Asp Deprotonated<br/>(%)</b> | <b>Glu Protonated<br/>(%)</b> | <b>Glu Deprotonated<br/>(%)</b> |
|-------------------------------|-------------------------------|---------------------------------|-------------------------------|---------------------------------|
| <b>1-10</b>                   | 70                            | 30                              | 80                            | 20                              |
| <b>10-20</b>                  | 65                            | 35                              | 75                            | 25                              |
| <b>20-30</b>                  | 60                            | 40                              | 70                            | 30                              |
| <b>30-40</b>                  | 55                            | 45                              | 65                            | 35                              |
| <b>40-50</b>                  | 50                            | 50                              | 60                            | 40                              |
| <b>50-60</b>                  | 45                            | 55                              | 55                            | 45                              |
| <b>60-70</b>                  | 40                            | 60                              | 50                            | 50                              |
| <b>70-80</b>                  | 35                            | 65                              | 45                            | 55                              |
| <b>80-90</b>                  | 30                            | 70                              | 40                            | 60                              |
| <b>90-100</b>                 | 75                            | 25                              | 65                            | 35                              |
